# Supplementary material
Source: Springer Nature journal article supplement (https://www.springermedizin.de/resource/supplementary/12955_2012_1095_MOESM3_ESM.pdf/9559260)

MORS (Child) 'warmth' subscale (Mwarmth)

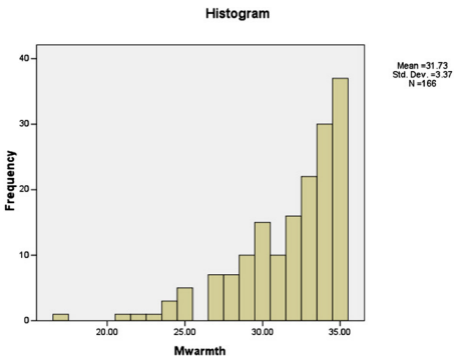

MORS (Child) 'invasiveness' subscale (Minvasiveness)

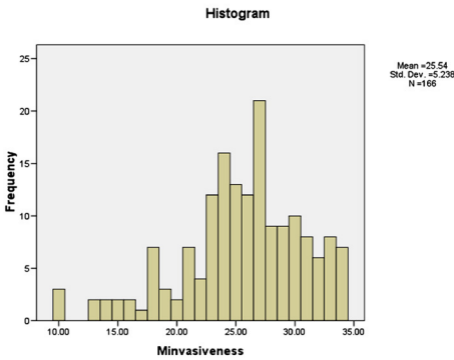

C-PAS 'closeness' subscale (Pcloseness)

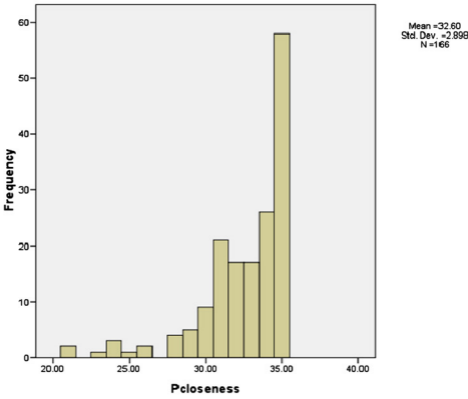

C-PAS 'conflict' subscale (Pconflict)

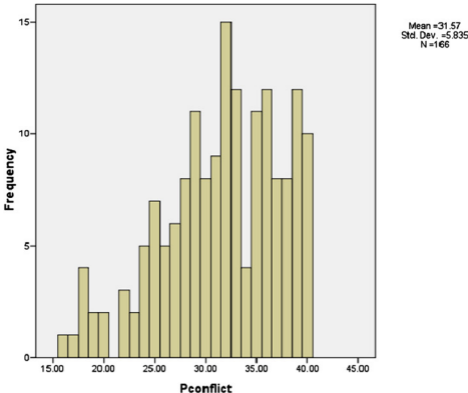

Supplement: MOESM3 [file 9559260]
